# Supplementary material for: Using the Nutrition Facts Label to Make Food Choices Is Associated with Healthier Eating among 8th and 11th-Grade Students: An Analysis of Statewide Representative Data from the 2019–2020 Texas School Physical Activity and Nutrition Survey
Source: MDPI journal article supplement (doi:10.3390/nu16020311), 2024-01-20
Supplement: s1 [file s1]

**Table S1.** Adolescents' self-reported prior day eating habits of 26 individual food items from the 2019–2020 Texas SPAN survey communicated as weighted percentages.

| Food Item              | Frequency   |            |             |               |
|------------------------|-------------|------------|-------------|---------------|
|                        | 0 Times (%) | 1 Time (%) | 2 Times (%) | 3 or More (%) |
| <b>Healthy Foods</b>   |             |            |             |               |
| Baked Meat             | 71.5        | 24.0       | 3.5         | 1.1           |
| Nuts                   | 71.7        | 21.8       | 4.8         | 1.7           |
| Brown Rice             | 83.6        | 14.1       | 2.0         | 0.3           |
| Brown Bread            | 68.2        | 24.3       | 6.1         | 1.4           |
| Starchy Vegetables     | 71.8        | 22.5       | 4.4         | 1.3           |
| Orange Vegetables      | 74.3        | 20.4       | 4.1         | 2.1           |
| Green Vegetables       | 71.1        | 23.4       | 4.0         | 1.5           |
| Other Vegetables       | 65.1        | 26.3       | 6.5         | 2.1           |
| Beans                  | 80.4        | 16.2       | 2.4         | 1.1           |
| Whole Fruit            | 39.5        | 38.9       | 15.2        | 6.4           |
| Fruit Juice            | 64.0        | 27.0       | 6.0         | 3.0           |
| Plain Milk             | 60.0        | 28.5       | 8.2         | 3.4           |
| Yogurt                 | 86.5        | 11.4       | 1.4         | 0.7           |
| <b>Unhealthy Foods</b> |             |            |             |               |
| Red Meat               | 47.8        | 39.3       | 10.9        | 2.0           |
| Fried Meat             | 63.2        | 30.0       | 5.5         | 1.3           |
| White Rice             | 62.7        | 30.8       | 5.4         | 1.1           |
| White Bread            | 39.5        | 41.2       | 15.1        | 4.2           |
| Chips                  | 24.1        | 49.0       | 12.5        | 4.3           |
| Frozen Dessert         | 78.4        | 18.3       | 2.4         | 0.9           |
| Cake                   | 57.2        | 33.2       | 7.3         | 2.4           |
| Candy                  | 55.4        | 31.1       | 7.0         | 6.4           |
| Flavored Milk          | 73.8        | 20.2       | 4.8         | 1.2           |
| Punch                  | 61.0        | 27.9       | 7.6         | 3.4           |
| Soda                   | 55.1        | 33.7       | 8.0         | 3.3           |
| Sweet Caffeine         | 73.1        | 19.8       | 4.8         | 2.3           |
| Energy Drinks          | 88.4        | 9.3        | 1.5         | 0.8           |

**Table S2.** Marginal predicted probabilities of SPAN HEI, HFI, and UFI scores associated with nutrition label usage calculated post-hoc from linear regression models, adjusted for grade, sex, Body Mass Index (BMI), race/ethnicity, economic disadvantage, and percent limited English proficiency by school.

| Food label usage to make food choices  | Margin | 95% CI     | p-value |
|----------------------------------------|--------|------------|---------|
| <b>SPAN Healthy Eating Index (HEI)</b> |        |            |         |
| Never                                  | 45.5   | 46.1, 46.8 | <0.001  |
| Almost never                           | 47.9   | 47.3, 48.6 | <0.001  |
| Sometimes                              | 48.8   | 48.4, 49.3 | <0.001  |
| Almost always                          | 50.7   | 49.6, 51.8 | <0.001  |
| Always                                 | 52.2   | 51.0, 53.5 | <0.001  |
| <b>Healthy Foods Index (HFI)</b>       |        |            |         |
| Never                                  | 11.4   | 10.6, 12.2 | <0.001  |
| Almost never                           | 12.7   | 11.7, 13.6 | <0.001  |
| Sometimes                              | 14.1   | 13.4, 14.8 | <0.001  |
| Almost always                          | 17.7   | 15.9, 19.4 | <0.001  |
| Always                                 | 18.7   | 16.0, 21.4 | <0.001  |
| <b>Unhealthy Foods Index (UFI)</b>     |        |            |         |
| Never                                  | 18.5   | 17.8, 19.2 | <0.001  |
| Almost never                           | 16.8   | 15.7, 17.8 | <0.001  |
| Sometimes                              | 16.5   | 15.6, 17.3 | <0.001  |
| Almost always                          | 16.2   | 14.4, 18.0 | <0.001  |

|        |      |            |        |
|--------|------|------------|--------|
| Always | 14.2 | 12.5, 15.9 | <0.001 |
|--------|------|------------|--------|

**Table S3.** Logistic regression results for the odds of consuming individual food items during the prior day when using nutrition labels to make food choices. Note: All models run separately for each food item and adjusted for grade, sex, Body Mass Index (BMI), race/ethnicity, economic disadvantage, and percent limited English proficiency by school.

| Food Label Usage to Make Food Choices<br>("Never/Almost Never" Referent) | Odds Ratio (OR) | 95%CI     | p-Value |
|--------------------------------------------------------------------------|-----------------|-----------|---------|
| <b>Baked Meat</b>                                                        |                 |           |         |
| Sometimes                                                                | 1.30            | 1.08,1.55 | 0.005   |
| Always/Almost always                                                     | 1.91            | 1.52,2.40 | <0.001  |
| <b>Nuts</b>                                                              |                 |           |         |
| Sometimes                                                                | 1.27            | 1.01,1.58 | 0.04    |
| Always/Almost always                                                     | 2.22            | 1.58,3.10 | <0.001  |
| <b>Brown Rice</b>                                                        |                 |           |         |
| Sometimes                                                                | 0.98            | 0.74,1.27 | 0.85    |
| Always/Almost always                                                     | 1.31            | 0.92,1.88 | 0.13    |
| <b>Brown Bread</b>                                                       |                 |           |         |
| Sometimes                                                                | 1.24            | 1.01,1.51 | 0.04    |
| Always/Almost always                                                     | 1.70            | 1.25,2.30 | 0.001   |
| <b>Starchy Vegetables</b>                                                |                 |           |         |
| Sometimes                                                                | 1.25            | 0.99,1.59 | 0.06    |
| Always/Almost always                                                     | 1.33            | 1.06,1.66 | 0.01    |
| <b>Orange Vegetables</b>                                                 |                 |           |         |
| Sometimes                                                                | 1.92            | 1.47,2.51 | <0.001  |
| Always/Almost always                                                     | 2.52            | 1.67,3.81 | <0.001  |
| <b>Green Vegetables</b>                                                  |                 |           |         |
| Sometimes                                                                | 1.66            | 1.30,2.10 | <0.001  |
| Always/Almost always                                                     | 3.05            | 2.30,4.05 | <0.001  |
| <b>Other Vegetables</b>                                                  |                 |           |         |
| Sometimes                                                                | 1.62            | 1.31,1.99 | <0.001  |
| Always/Almost always                                                     | 3.07            | 2.35,4.02 | <0.001  |
| <b>Beans</b>                                                             |                 |           |         |
| Sometimes                                                                | 1.26            | 0.99,1.61 | 0.07    |
| Always/Almost always                                                     | 1.49            | 1.03,2.16 | 0.03    |
| <b>Whole Fruit</b>                                                       |                 |           |         |
| Sometimes                                                                | 1.65            | 1.31,2.08 | <0.001  |
| Always/Almost always                                                     | 2.11            | 1.42,3.12 | <0.001  |
| <b>Fruit Juice</b>                                                       |                 |           |         |
| Sometimes                                                                | 1.10            | 0.86,1.42 | 0.45    |
| Always/Almost always                                                     | 1.37            | 0.99,1.91 | 0.06    |
| <b>Plain Milk</b>                                                        |                 |           |         |
| Sometimes                                                                | 1.30            | 1.11,1.52 | 0.001   |
| Always/Almost always                                                     | 1.17            | 0.85,1.61 | 0.34    |
| <b>Yogurt</b>                                                            |                 |           |         |
| Sometimes                                                                | 1.14            | 0.87,1.49 | 0.34    |
| Always/Almost always                                                     | 1.86            | 1.23,2.81 | 0.004   |
| <b>Red Meat</b>                                                          |                 |           |         |
| Sometimes                                                                | 1.06            | 0.87,1.29 | 0.55    |
| Always/Almost always                                                     | 0.80            | 0.61,1.04 | 0.11    |
| <b>Fried Meat</b>                                                        |                 |           |         |
| Sometimes                                                                | 0.96            | 0.79,1.18 | 0.72    |
| Always/Almost always                                                     | 0.88            | 0.63,1.23 | 0.47    |
| <b>White Rice</b>                                                        |                 |           |         |
| Sometimes                                                                | 1.06            | 0.86,1.30 | 0.58    |
| Always/Almost always                                                     | 1.15            | 0.91,1.46 | 0.23    |

| Food Label Usage to Make Food Choices<br>("Never/Almost Never" Referent) | Odds Ratio (OR) | 95%CI     | p-Value |
|--------------------------------------------------------------------------|-----------------|-----------|---------|
| <b>White Bread</b>                                                       |                 |           |         |
| Sometimes                                                                | 1.09            | 0.85,1.41 | 0.48    |
| Always/Almost always                                                     | 0.88            | 0.60,1.29 | 0.50    |
| <b>Chips</b>                                                             |                 |           |         |
| Sometimes                                                                | 0.90            | 0.76,1.06 | 0.20    |
| Always/Almost always                                                     | 0.61            | 0.45,0.82 | 0.002   |
| <b>Frozen Dessert</b>                                                    |                 |           |         |
| Sometimes                                                                | 0.09            | 0.77,1.14 | 0.52    |
| Always/Almost always                                                     | 0.91            | 0.64,1.27 | 0.57    |
| <b>Cake</b>                                                              |                 |           |         |
| Sometimes                                                                | 0.87            | 0.68,1.10 | 0.24    |
| Always/Almost always                                                     | 0.68            | 0.52,0.87 | 0.003   |
| <b>Candy</b>                                                             |                 |           |         |
| Sometimes                                                                | 0.77            | 0.60,0.99 | 0.04    |
| Always/Almost always                                                     | 0.63            | 0.47,0.83 | 0.001   |
| <b>Flavored Milk</b>                                                     |                 |           |         |
| Sometimes                                                                | 1.04            | 0.82,1.32 | 0.73    |
| Always/Almost always                                                     | 0.87            | 0.57,1.31 | 0.50    |
| <b>Punch</b>                                                             |                 |           |         |
| Sometimes                                                                | 0.96            | 0.77,1.21 | 0.74    |
| Always/Almost always                                                     | 0.84            | 0.62,1.14 | 0.26    |
| <b>Soda</b>                                                              |                 |           |         |
| Sometimes                                                                | 0.68            | 0.58,0.80 | <0.001  |
| Always/Almost always                                                     | 0.48            | 0.36,0.66 | <0.001  |
| <b>Sweet Caffeine</b>                                                    |                 |           |         |
| Sometimes                                                                | 0.87            | 0.65,1.16 | 0.34    |
| Always/Almost always                                                     | 1.01            | 0.74,1.38 | 0.95    |
| <b>Energy Drinks</b>                                                     |                 |           |         |
| Sometimes                                                                | 0.98            | 0.72,1.33 | 0.89    |
| Always/Almost always                                                     | 1.89            | 1.31,2.72 | 0.001   |

**Disclaimer/Publisher's Note:** The statements, opinions and data contained in all publications are solely those of the individual author(s) and contributor(s) and not of MDPI and/or the editor(s). MDPI and/or the editor(s) disclaim responsibility for any injury to people or property resulting from any ideas, methods, instructions or products referred to in the content.
